# Supplementary material for: Assessment of the platelet-derived growth factor receptor alpha antibody olaratumab in a panel of patient-derived soft tissue sarcoma xenografts
Source: Springer Nature journal article supplement (doi:10.1186/s12885-019-5872-1), 2019-07-22

# Cornillie et al. Supplementary Figure 1

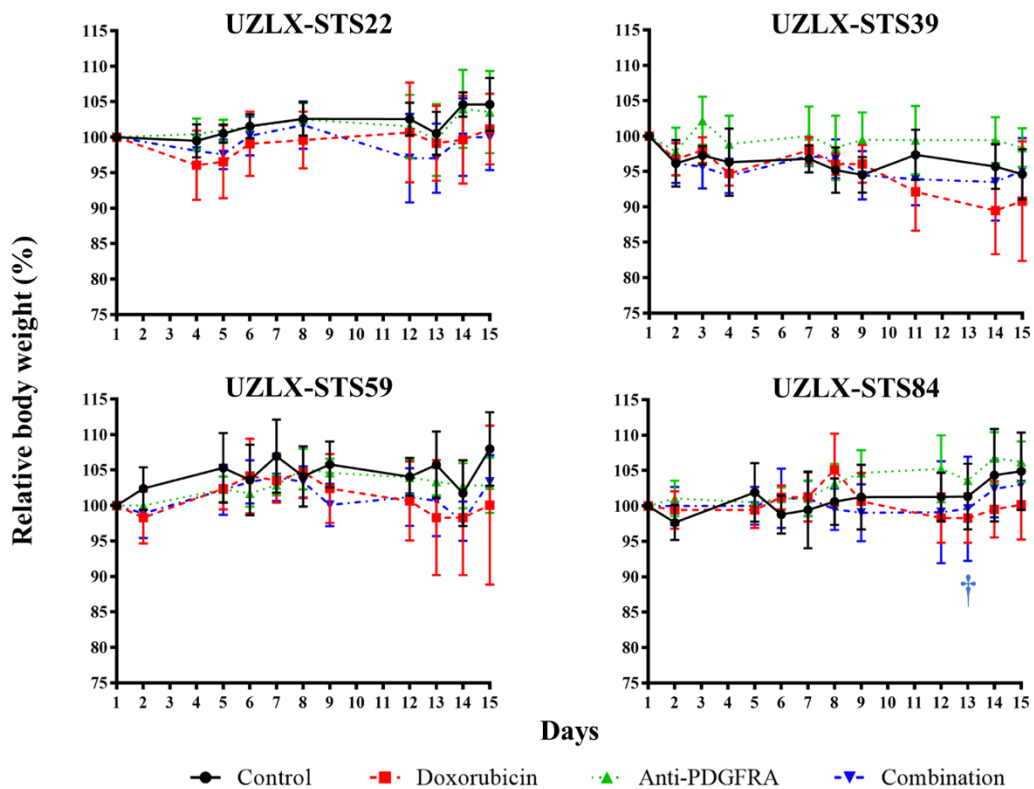

Supplement: MOESM1 [file 16970408]
